# Supplementary figures and images for: Establishment of regions of genomic activity during the Drosophila maternal to zygotic transition
Source: eLife journal article supplement (doi:10.7554/elife.03737), 2014-10-14

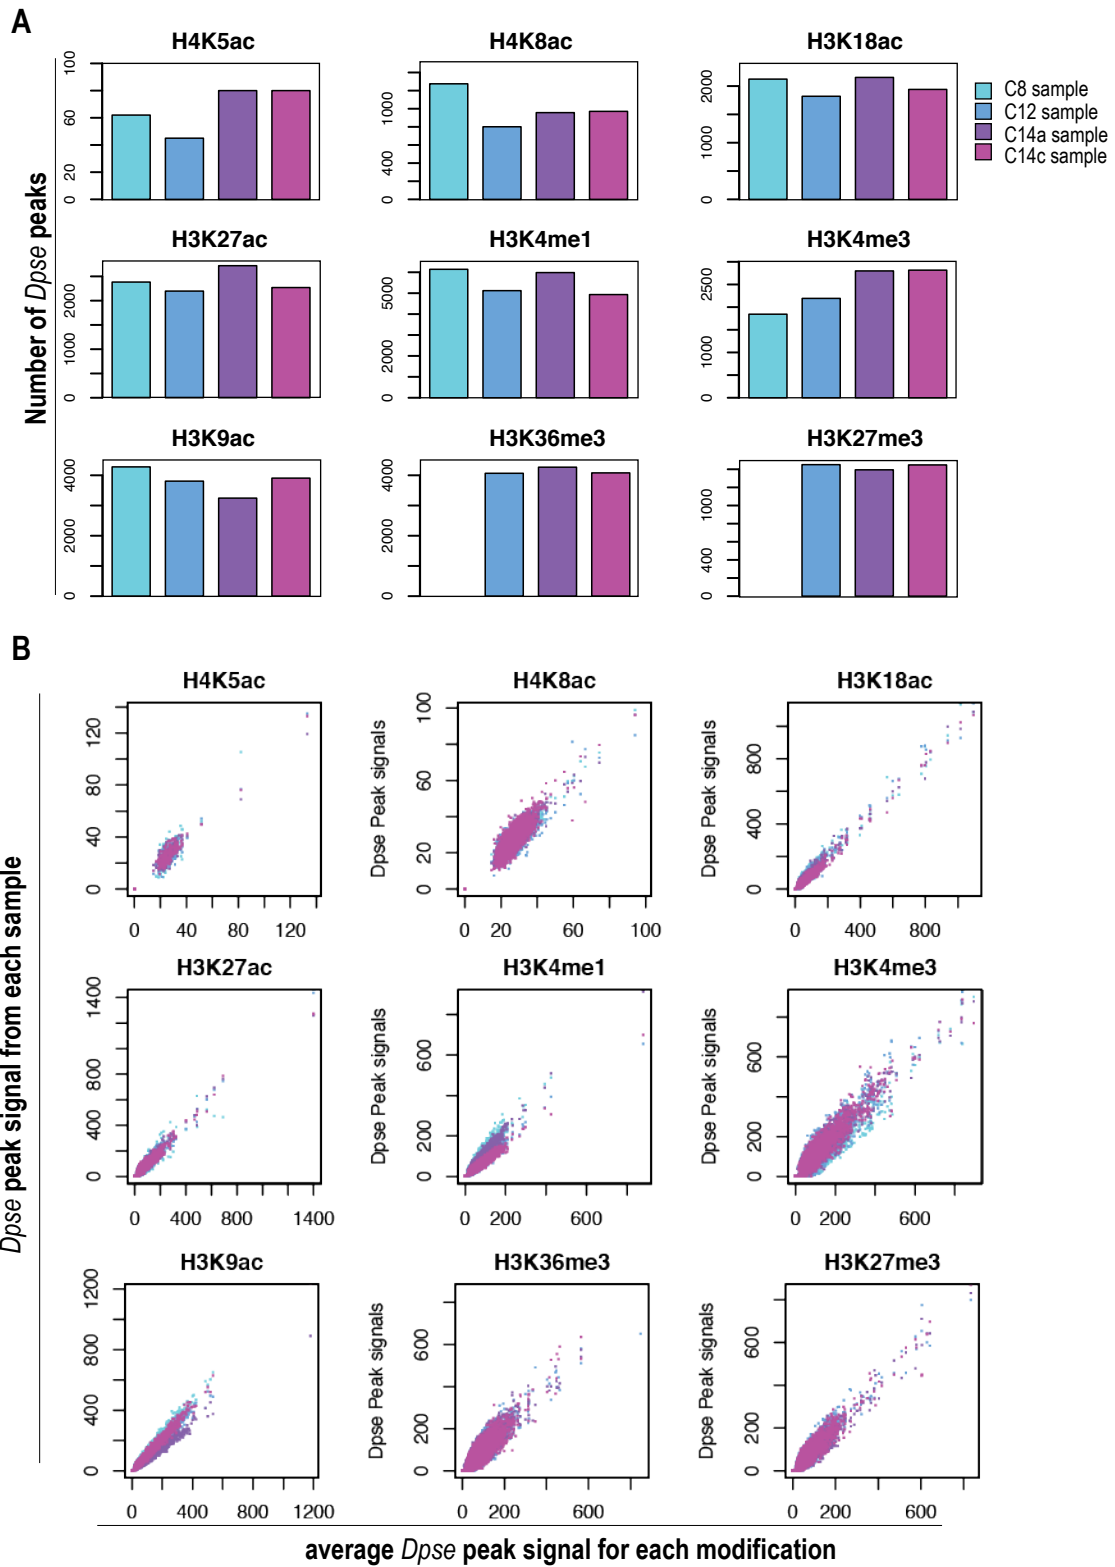

Li - Figure S1

Supplement: supp [file elife_poa_e03737_Figure_1_Figure_S1.pdf › elife_poa_e03737_Figure_1_Figure_S1.pdf]
